# Supplementary material
Source: PubMed Central journal article supplement (PMC3156201)
Supplement: 1100186108_pnas.201100186SI.pdf [file 1100186108_pnas.201100186SI.pdf]

# Supporting Information

Maisonneuve et al. 10.1073/pnas.1100186108

## SI Materials and Methods

**Bacterial Strains and Plasmids.** Bacterial strains and plasmids are listed in Table S2, and DNA primers are listed in Table S3.

**Strain and Plasmid Construction. Construction of the  $\Delta 10TA$  strains.** We previously developed in our laboratory a parent strain deleted of five TA loci (*relBE*, *chpB*, *mazF*, *dinJ/yafQ*, and *yefM/yoeB*) (11). Here, we deleted the five newly described TA pairs of *E. coli* K-12 (*yafNO*, *hicAB*, *higBA*, *prf/yhaV*, and *MqsRA*) (2, 5, 6). To minimize deleterious effects of leaving an Flippase Recognition Target scar-sequence at each deletion, we used a marker- and scarless-deletion procedure also developed by the Wanner laboratory (12). First, the TA pair to be deleted was replaced by an *aphA* (Kan<sup>R</sup>)-encoding gene cassette. The cassette also contained the toxin gene *parE* of RK2 (13) under the control of a rhamnose-inducible promoter. The *aphA-parE* cassette was then removed by using a combined PCR product of the flanking regions of the integrated cassette. By counterselection on rhamnose-containing plates, where the toxic gene *parE* is induced, we were able to select for positive marker and scarless transformants. After deletion of one TA pair, we sequentially removed the remaining TA systems in the same manner, resulting in the  $\Delta 10TA$  strain (MG1655  $\Delta mazF$   $\Delta chpB$   $\Delta relBE$   $\Delta (dinJ-yafQ)$   $\Delta (yefM-yoeB)$   $\Delta higBA$   $\Delta (prf/yhaV)$   $\Delta yafNO$   $\Delta mqsRA$   $\Delta hicAB$ ). We next describe in detail how one TA locus (*higBA*) was deleted by the marker and scarless method.

Briefly, cells were transformed with plasmid pKD46 carrying the arabinose-inducible *λred* gene. pKD46-containing cells were grown in LB at 30 °C to an OD<sub>450</sub> of 0.4. The *λred* was induced by addition of 0.2% arabinose for 20 min. Cells were made electrocompetent by several wash steps with ice-cold H<sub>2</sub>O. The cells were electroporated with a purified PCR product amplified from pKD267 containing homologous ends flanking the *higBA* operon and plated on solid medium containing kanamycin (25 μg/mL). Kanamycin-resistant colonies were retransformed with pKD46 and made electrocompetent. Cells were electroporated with a purified PCR product containing flanking regions of the *higBA* operon. The PCR product was made in two steps in the following way. A first PCR product was generated using primers *higBA*-up-f and *higBA*-up-r, and a second PCR product was then generated using primers *higBA*-down-f and *higBA*-down-r. The two products were purified and mixed 1:1 in a second round of PCR using primers *higBA* up-f and *higBA*-down-r. Electroporated cells were plated on M9 minimal plates containing 0.5% rhamnose as the only carbon source.

**Construction of strain EJM46.** A P1 lysate was made from JW2990 (BW25113  $\Delta mqsR::kan$ ), and the *kan* allele was transduced into MG1655  $\Delta hicAB::frt$ . The kanamycin resistance cassette was removed using the pCP20 plasmid (14).

**Construction of EJM467.** A P1 lysate was made from JW0223 (BW25113  $\Delta yafO::kan$ ), and the *kan* allele was transduced into EJM46. The kanamycin resistance cassette was removed using the pCP20 plasmid (14).

**Construction of EJM4678.** A P1 lysate was made from JW3099 (BW25113  $\Delta yhaV::kan$ ), and the *kan* allele was transduced into EJM467. The kanamycin resistance cassette was removed using the pCP20 plasmid (14).

**Construction of EJM46789.** A P1 lysate was made from JW3054 (BW25113  $\Delta higB::kan$ ), and the *kan* allele was transduced into EJM4678. The kanamycin resistance cassette was removed using the pCP20 plasmid (14).

**Construction of M011.** An EcoRI-SalI fragment from pMO227 plasmid carrying the *relB-relE*<sup>R81A</sup>::*DsRed2* gene fusion was ligated with an EcoRI-SalI fragment of plasmid pTAC3590 containing the *aphA* (Kan<sup>R</sup>) gene and *λ attP*, thereby generating circular DNA substrates for integration into the chromosome at *attB* (15).

**Construction of pCA24N-*lon*<sup>K362Q</sup> and pCA24N-*lon*<sup>S679A</sup>.** The GFP gene from pCA24N (16) has been removed by NotI digestion, followed by self-ligation. The *lon* gene was amplified from pBAD::*lon*<sup>K362Q</sup> or pBAD::*lon*<sup>S679A</sup> (17) with primers *lon*-f and *lon*-r (Table S3). Primers were designed as described by Kitagawa et al. (16) and were phosphorylated before being used in PCR. The PCR products were individually ligated with vector pCA24N (GFP-free) that had been digested with StuI and dephosphorylated.

**Construction of plasmid pMO227.** Plasmid pMGJ4004 was digested with BamHI and StuI to generate an ~8.5-kb fragment, including R1 origin and *bla*. pMO229 was then used as a PCR template, together with *DsRed2*-BamHI-SD8-f (Table S3); BamHI-tailed forward primer, which places a strong SD8 Ribosome Binding Site in front of *DsRed2* (Clontech); and *DsRed2*-EcoRV-r (Table S3) EcoRV-tailed reverse primer for *DsRed2*. The PCR product was combined with the BamHI-StuI fragment of pMGJ4004, leading to pMO227 (*relB-relE*<sup>R81A</sup>::*DsRed2*).

**Construction of plasmid pEJM10.** A DNA fragment encoding *yefM* and six histidine codons at the 5' end of *yefM* was generated by PCR using *yefM*-f and *yefM*-r (Table S3) as oligonucleotides. The fragment was cut with EcoRI and BamHI and ligated with pMG25 digested with the same enzymes.

**Growth Conditions and Media.** Cells were grown in LB at 37 °C with shaking. When appropriate, the medium was supplemented with chloramphenicol (50 μg/mL; Sigma). The P<sub>T5-lac</sub> promoter was induced by the addition of 100 μM isopropyl β-D-1-thiogalactopyranoside (IPTG), and the P<sub>BAD</sub> promoter was induced by the addition of 0.2% arabinose.

**Persister Cell Assay.** Persistence was measured by determining the number of cfu/mL on exposure to 1 μg/mL ciprofloxacin or 100 μg/mL ampicillin (Sigma). Overnight cultures were diluted 100-fold in 10 mL of fresh medium in a 100-mL flask and incubated for 2.5 h at 37 °C with shaking (typically reaching ~2 × 10<sup>8</sup> cfu/mL). Aliquots of 5 mL were then transferred in 28 × 114-mm Sarstedt canonical polypropylene tubes, and antibiotics were added at the indicated concentrations. Tubes were placed at an inclination of 45 °C with shaking at 37 °C for 5 h. For determination of cfu counts, 1-mL aliquots were removed at the indicated time and the cells were harvested, resuspended in fresh medium, serially diluted, and plated on solid medium. Persisters were calculated as the surviving fraction by dividing the number of cfu/mL in the culture after 5 h of incubation with the antibiotic by the number of cfu/mL in the culture before adding the antibiotic.

**Determination of Persister in Cells Overexpressing mRNases.** To determine the number of persisters formed by cells expressing mRNases from plasmid pBAD33, cells were grown in rich medium for 1.5 h and mRNAse production was induced by the addition of 0.2% of arabinose for 45 min. Then, 0.2% of glucose was added to repress pBAD promoter, and cells were grown for an additional 15 min. Next, 5-mL aliquots were subjected to antibiotic (ampicillin or ciprofloxacin) and persister cell formation determined as described above, except that the cells were plated on solid medium 0.2% glucose (without antibiotics).

**Determination of Persisters in Cells Overexpressing Lon.** To determine the number of persisters formed by cells overexpressing Lon or its mutant forms (Lon<sup>K362Q</sup> or Lon<sup>S679A</sup>) from pAC24N, cells were grown in rich medium as described above but with the addition of 100  $\mu$ M IPTG for 2.5 h. At this relatively low level of induction, cell growth was indistinguishable from that of the uninduced culture. Then, 5-mL aliquots were subjected to antibiotic (ampicillin or ciprofloxacin) and persister cell formation was determined as described above.

**Microscopy.** For phase-contrast and fluorescence microscopy, 1-mL culture samples were taken at each time point, centrifuged for 5 min at 1,200  $\times$  g, and then resuspended in 100  $\mu$ L of LB. Next, 1–3  $\mu$ L of the resuspended culture was placed on a microscope slide coated with a thin LB agarose (1%) layer and then covered with a coverslip. Prepared microscope slides were warmed before use to minimize shock to the cells. Images were acquired with a Cool-Snap HQ cooled CCD camera (Roper Scientific) attached to a DeltaVision microscope (Applied Precision). The images were acquired and analyzed with the softWoRx (IMSOL) computer program using a bright-field channel first and then

a red fluorescence filter channel. Final image preparation was performed in ImageJ (National Institutes of Health).

**MIC Determination.** MICs for ampicillin and ciprofloxacin were determined by the agar dilution method (18). Briefly, inoculums of  $\sim 10^4$  cfu were spotted by micropipette, delivering 3  $\mu$ L to the LB-agar plates containing a range of antibiotic concentrations. The MIC was the lowest concentration of drug that prevented visible growth after 24 h of incubation at 37  $^{\circ}$ C.

**In Vivo YefM Degradation and Western Blot Analysis.** The degradation rate of His6-YefM was determined using samples from exponentially growing cells. Expression of His6-YefM protein from pEJM10 was induced by the addition of 1 mM IPTG at an OD<sub>600</sub> of 0.4. After 30 min of induction, protein synthesis was stopped by addition of 100  $\mu$ g/mL chloramphenicol, and samples were removed at the indicated time points. His6-YefM protein was detected by Western blotting using a monoclonal His-tag antibody (Qiagen) and a polyclonal goat-anti mouse IgG HRP conjugate (Sigma-Aldrich).

- Christensen-Dalsgaard M, Gerdes K (2008) Translation affects YoeB and MazF messenger RNA interferase activities by different mechanisms. *Nucleic Acids Res* 36: 6472–6481.
- Christensen-Dalsgaard M, Jørgensen MG, Gerdes K (2010) Three new RelE-homologous mRNA interferases of *Escherichia coli* differentially induced by environmental stresses. *Mol Microbiol* 75:333–348.
- Pedersen K, et al. (2003) The bacterial toxin RelE displays codon-specific cleavage of mRNAs in the ribosomal A site. *Cell* 112:131–140.
- Prysak MH, et al. (2009) Bacterial toxin YafQ is an endoribonuclease that associates with the ribosome and blocks translation elongation through sequence-specific and frame-dependent mRNA cleavage. *Mol Microbiol* 71:1071–1087.
- Schmidt O, et al. (2007) prfF and yhaV encode a new toxin-antitoxin system in *Escherichia coli*. *J Mol Biol* 372:894–905.
- Jørgensen MG, Pandey DP, Jaskolska M, Gerdes K (2009) HicA of *Escherichia coli* defines a novel family of translation-independent mRNA interferases in bacteria and archaea. *J Bacteriol* 191:1191–1199.
- Zhang YL, et al. (2003) MazF cleaves cellular mRNAs specifically at ACA to block protein synthesis in *Escherichia coli*. *Mol Cell* 12:913–923.
- Zhang YL, Zhu L, Zhang JJ, Inouye M (2005) Characterization of ChpBK, an mRNA interferase from *Escherichia coli*. *J Biol Chem* 280:26080–26088.
- Schumacher MA, et al. (2009) Molecular mechanisms of HipA-mediated multidrug tolerance and its neutralization by HipB. *Science* 323:396–401.
- Overgaard M, Borch J, Jørgensen MG, Gerdes K (2008) Messenger RNA interferase RelE controls relBE transcription by conditional cooperativity. *Mol Microbiol* 69: 841–857.
- Christensen SK, et al. (2004) Overproduction of the Lon protease triggers inhibition of translation in *Escherichia coli*: Involvement of the yefM-yoeB toxin-antitoxin system. *Mol Microbiol* 51:1705–1717.
- Datsenko KA, Wanner BL (2000) One-step inactivation of chromosomal genes in *Escherichia coli* K-12 using PCR products. *Proc Natl Acad Sci USA* 97:6640–6645.
- Roberts RC, Helinski DR (1992) Definition of a minimal plasmid stabilization system from the broad-host-range plasmid RK2. *J Bacteriol* 174:8119–8132.
- Baba T, et al. (2006) Construction of *Escherichia coli* K-12 in-frame, single-gene knockout mutants: The Keio collection. *Mol Syst Biol* 2:2006.0008.
- Atlung T, Nielsen A, Rasmussen LJ, Nellemann LJ, Holm F (1991) A versatile method for integration of genes and gene fusions into the lambda attachment site of *Escherichia coli*. *Gene* 107:11–17.
- Kitagawa M, et al. (2005) Complete set of ORF clones of *Escherichia coli* ASKA library (a complete set of *E. coli* K-12 ORF archive): Unique resources for biological research. *DNA Res* 12:291–299.
- Van Melderen L, Gottesman S (1999) Substrate sequestration by a proteolytically inactive Lon mutant. *Proc Natl Acad Sci USA* 96:6064–6071.
- Andrews JM (2001) Determination of minimum inhibitory concentrations. *J Antimicrob Chemother* 48(Suppl 1):5–16.
- Guyer MS, Reed RR, Steitz JA, Low KB (1981) Identification of a sex-factor-affinity site in *E. coli* as gamma delta. *Cold Spring Harb Symp Quant Biol* 45:135–140.
- Bernhardt TG, de Boer PA (2003) The *Escherichia coli* amidase AmiC is a periplasmic septal ring component exported via the twin-arginine transport pathway. *Mol Microbiol* 48:1171–1182.
- Christensen SK, Pedersen K, Hansen FG, Gerdes K (2003) Toxin-antitoxin loci as stress-response-elements: ChpAK/MazF and ChpBK cleave translated RNAs and are counteracted by tmRNA. *J Mol Biol* 332:809–819.
- Winther KS, Gerdes K (2009) Ectopic production of VapCs from Enterobacteria inhibits translation and trans-activates YoeB mRNA interferase. *Mol Microbiol* 72:918–930.
- Guzman LM, Belin D, Carson MJ, Beckwith J (1995) Tight regulation, modulation, and high-level expression by vectors containing the arabinose PBAD promoter. *J Bacteriol* 177:4121–4130.
- Pedersen K, Christensen SK, Gerdes K (2002) Rapid induction and reversal of a bacteriostatic condition by controlled expression of toxins and antitoxins. *Mol Microbiol* 45:501–510.



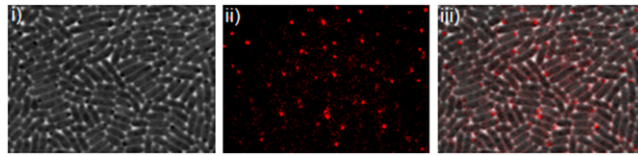

**Fig. S4.** Titration of RelB by RelE<sup>CS6</sup> in a strain lacking *wt relBE* (MO12). RelE<sup>CS6</sup> overexpression from plasmid pKP3103 in strain MO12 ( $\Delta relBE relBE^{R81A}::dsRed2 \equiv MO11\Delta relBE$ ) was induced by arabinose (0.2%) for 2 h, and cells were analyzed by microscopy. As seen, more than 50% of the cells of MO12 became fluorescent. This high fraction should be compared with the much lower fraction (0.083%) seen with strain MO11, supporting the interpretation that endogenous RelE encoded by *relBE* in MO11 is activated and inhibits translation and formation of DsRed2; hence, there is a very low fraction of fluorescent cells in MO11 but a high fraction in MO12. Images represent phase contrast (i; *Left*), fluorescence (ii, *Center*), and merged (iii; *Right*) images, respectively.

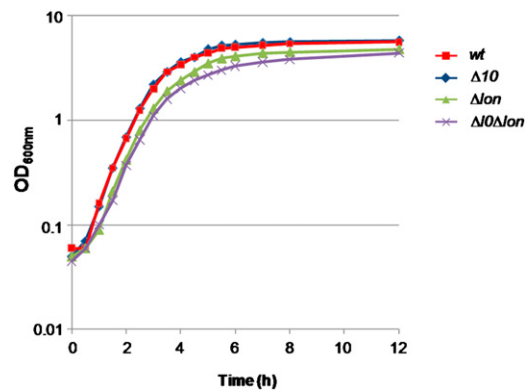

**Fig. S5.** Growth curves of strains MG1655 (*wt*) and its  $\Delta 10TA$ ,  $\Delta lon$ , and  $\Delta 10TA\Delta lon$  derivatives. Cells were grown in LB at 37 °C for more than 12 h.

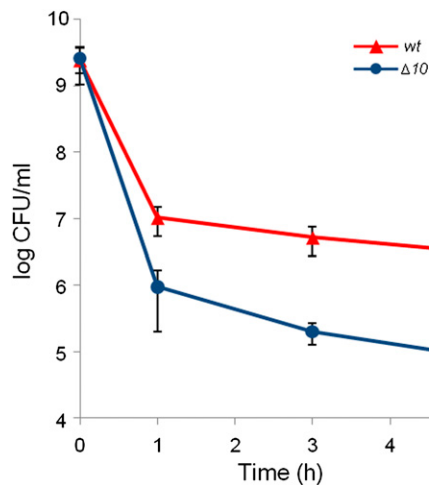

**Fig. S6.** Persisters generated by *wt* and  $\Delta 10TA$  strains in stationary phase. Stationary phase cultures (12 h) of MG1655 (*wt*) and its  $\Delta 10TA$  derivative were exposed to 1  $\mu$ g/mL ciprofloxacin. Numbers of surviving cells were determined by plating on solid medium. The graphs show averages of three independent experiments; error bars indicate the SD.

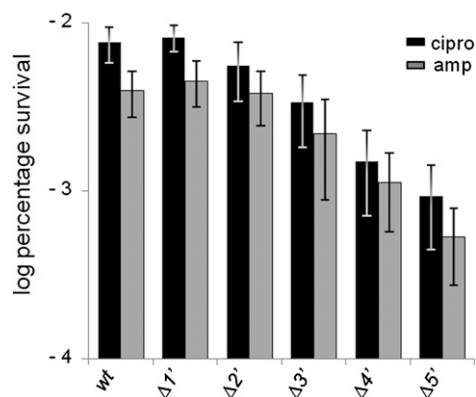

**Fig. S7.** Cumulative contribution of mRNases to persister cell formation. Exponentially growing cells of MG1655 carrying increasing numbers of deletions of TA genes encoding mRNases (the antitoxin genes were not deleted except in the case of *hicB*; in such case, both *hicA* and *hicB* were deleted) were exposed to 1 µg/mL ciprofloxacin (black bars) or 100 µg/mL ampicillin (gray bars). The percentage of survival after 5 h of antibiotic treatment was compared with that of the wt strain (log scale). The bars show averages of at least three independent experiments; error bars indicate the SD. The genotypes of  $\Delta 1'$  to  $\Delta 5'$  strains are listed in Table S2. amp, ampicillin; cipro, ciprofloxacin.

**Table S1. MICs**

| Strain                 | MICs* (mean $\pm$ SD) |                        |
|------------------------|-----------------------|------------------------|
|                        | Ciprofloxacin, ng/mL  | Ampicillin, $\mu$ g/mL |
| <i>wt</i>              | 5.3 $\pm$ 0.45        | 3.4 $\pm$ 0.42         |
| $\Delta 10$            | 5.0 $\pm$ 0.35        | 3.2 $\pm$ 0.27         |
| $\Delta lon$           | 2.8 $\pm$ 0.27        | 5.7 $\pm$ 0.75         |
| $\Delta 10 \Delta lon$ | 2.5 $\pm$ 0.35        | 5.4 $\pm$ 0.42         |

\*MICs were determined as described in *SI Materials and Methods*.

Table S2. Strains and plasmids

| Strains/plasmids                      | Genotype/plasmid properties                                                                                                                                               | Source                           |
|---------------------------------------|---------------------------------------------------------------------------------------------------------------------------------------------------------------------------|----------------------------------|
| MG1655                                | <i>E. coli</i> K-12 (wt); <i>rph1</i>                                                                                                                                     | 19                               |
| TB28                                  | MG1655 $\Delta lac$                                                                                                                                                       | 20                               |
| SC30                                  | MG1655 $\Delta mazF^*$                                                                                                                                                    | 21                               |
| SC31 ( $\Delta 17A$ )                 | MG1655 $\Delta chpB$                                                                                                                                                      | 21                               |
| SC34                                  | MG1655 $\Delta relBE$                                                                                                                                                     | 21                               |
| SC36                                  | MG1655 $\Delta(yefM-yoeB)$                                                                                                                                                | 11                               |
| SC37                                  | MG1655 $\Delta(dinJ-yafQ)$                                                                                                                                                | 11                               |
| MCD2801                               | TB28 $\Delta yafNO::kan$                                                                                                                                                  | 2                                |
| MCD2802                               | TB28 $\Delta higAB::kan$                                                                                                                                                  | 2                                |
| MCD2803                               | TB28 $\Delta mqsRA::kan$                                                                                                                                                  | 2                                |
| MG1655 $\Delta yafNO$                 | MG1655 $\Delta yafNO::kan$                                                                                                                                                | P1 MCD2801 x MG1655              |
| MG1655 $\Delta higAB$                 | MG1655 $\Delta higAB::kan$                                                                                                                                                | P1 MCD2802 x MG1655              |
| MG1655 $\Delta mqsRA$                 | MG1655 $\Delta mqsRA::kan$                                                                                                                                                | P1 MCD2803 x MG1655              |
| MG1655 $\Delta hicAB$ ( $\Delta 1'$ ) | MG1655 $\Delta hicAB::frt$                                                                                                                                                | 6                                |
| MG1655 $\Delta yhaV$                  | MG1655 $\Delta yhaV::kan$                                                                                                                                                 | P1 JW3099 x MG1655               |
| SC301 ( $\Delta 2TA$ )                | MG1655 $\Delta mazF^* \Delta chpB$                                                                                                                                        | 11                               |
| SC3410 ( $\Delta 3TA$ )               | MG1655 $\Delta mazF^* \Delta chpB \Delta relBE$                                                                                                                           | 11                               |
| SC30146 ( $\Delta 4TA$ )              | MG1655 $\Delta mazF^* \Delta chpB \Delta relBE \Delta yefM/yoeB$                                                                                                          | 11                               |
| SC301467 ( $\Delta 5TA$ )             | MG1655 $\Delta mazF^* \Delta chpB \Delta relBE \Delta(dinJ-yafQ) \Delta(yefM-yoeB)$                                                                                       | 11                               |
| MGJ59 ( $\Delta 6TA$ )                | MG1655 $\Delta mazF^* \Delta chpB \Delta relBE \Delta(dinJ-yafQ) \Delta(yefM-yoeB) \Delta higBA$                                                                          | This work                        |
| MGJ598 ( $\Delta 7TA$ )               | MG1655 $\Delta mazF^* \Delta chpB \Delta relBE \Delta(dinJ-yafQ) \Delta(yefM-yoeB) \Delta higBA \Delta(prfY-yhaV)$                                                        | This work                        |
| MGJ5987 ( $\Delta 8TA$ )              | MG1655 $\Delta mazF^* \Delta chpB \Delta relBE \Delta(dinJ-yafQ) \Delta(yefM-yoeB) \Delta higBA \Delta(prfY-yhaV) \Delta yafNO$                                           | This work                        |
| MGJ5987 ( $\Delta 9TA$ )              | MG1655 $\Delta mazF^* \Delta chpB \Delta relBE \Delta(dinJ-yafQ) \Delta(yefM-yoeB) \Delta higBA \Delta(prfY-yhaV) \Delta yafNO \Delta mqsRA$                              | This work                        |
| MGJ5987 ( $\Delta 10TA$ )             | MG1655 $\Delta mazF^* \Delta chpB \Delta relBE \Delta(dinJ-yafQ) \Delta(yefM-yoeB) \Delta higBA \Delta(prfY-yhaV) \Delta yafNO \Delta mqsRA \Delta hicAB$                 | This work                        |
| JW0428                                | BW25113 $\Delta clpX::kan$                                                                                                                                                | 14                               |
| JW0427                                | BW25113 $\Delta clpP::kan$                                                                                                                                                | 14                               |
| JW0866                                | BW25113 $\Delta clpA::kan$                                                                                                                                                | 14                               |
| JW3903                                | BW25113 $\Delta hslV::kan$                                                                                                                                                | 14                               |
| JW3902                                | BW25113 $\Delta hslU::kan$                                                                                                                                                | 14                               |
| JW3099                                | BW25113 $\Delta yhaV::kan$                                                                                                                                                | 14                               |
| JW2990                                | BW25113 $\Delta mqsR::kan$                                                                                                                                                | 14                               |
| JW0223                                | BW25113 $\Delta yafO::kan$                                                                                                                                                | 14                               |
| JW3054                                | BW25113 $\Delta higB::kan$                                                                                                                                                | 14                               |
| MG1655 $\Delta clpX$                  | MG1655 $\Delta clpX::kan$                                                                                                                                                 | P1 JW0428 x MG1655               |
| MG1655 $\Delta clpP$                  | MG1655 $\Delta clpP::kan$                                                                                                                                                 | P1 JW0427 x MG1655               |
| MG1655 $\Delta clpA$                  | MG1655 $\Delta clpA::kan$                                                                                                                                                 | P1 JW0866 x MG1655               |
| MG1655 $\Delta hslV$                  | MG1655 $\Delta hslV::kan$                                                                                                                                                 | P1 JW3903 x MG1655               |
| MG1655 $\Delta hslU$                  | MG1655 $\Delta hslU::kan$                                                                                                                                                 | P1 JW3902 x MG1655               |
| MG1655 $\Delta lon$                   | MG1655 $\Delta lon::tet$                                                                                                                                                  | 22                               |
| $\Delta 10\Delta lon$                 | MG1655 $\Delta mazF^* \Delta chpB \Delta relBE \Delta(dinJ-yafQ) \Delta(yefM-yoeB) \Delta higBA \Delta(prfY-yhaV) \Delta yafNO \Delta mqsRA \Delta hicAB \Delta lon::tet$ | P1 MG1655 $\Delta lon$ x MGJ5987 |
| EJM46 ( $\Delta 2'$ )                 | MG1655 $\Delta hicAB::frt \Delta mqsR::frt$                                                                                                                               | This work                        |
| EJM467 ( $\Delta 3'$ )                | MG1655 $\Delta hicAB::frt \Delta mqsR::frt \Delta yafO::frt$                                                                                                              | This work                        |
| EJM4678 ( $\Delta 4'$ )               | MG1655 $\Delta hicAB::frt \Delta mqsR::frt \Delta yafO::frt \Delta yhaV::frt$                                                                                             | This work                        |
| EJM46789 ( $\Delta 5'$ )              | MG1655 $\Delta hicAB::frt \Delta mqsR::frt \Delta yafO::frt \Delta yhaV::frt \Delta higB::frt$                                                                            | This work                        |
| MO11                                  | MG1655 <i>attB::relB-relE<sup>R81A</sup>::DsRed2</i>                                                                                                                      | This work                        |
| MO12                                  | MG1655 $\Delta relBE$ <i>attB::relB-relE<sup>R81A</sup>::DsRed2</i>                                                                                                       | This work                        |
| pBAD33                                | p15A; cat; pBAD promoter                                                                                                                                                  | 23                               |
| pKP3035                               | pBAD33; pBAD::relE                                                                                                                                                        | 24                               |
| pKP3103                               | pBAD33; pBAD::his6::relE <sup>CS6</sup>                                                                                                                                   | 24                               |
| pMCD3326                              | pBAD33; pBAD::SD <sub>opt</sub> ::mazF                                                                                                                                    | 1                                |
| pMCD3312                              | pBAD33; pBAD::SD::mqsR                                                                                                                                                    | 2                                |
| pMCD3306                              | pBAD33; pBAD::SD::yafO                                                                                                                                                    | 2                                |
| pMCD3310                              | pBAD33; pBAD::SD::higB                                                                                                                                                    | 2                                |
| pCA24N                                | cat; lacI <sup>q</sup> ; pCA24N**                                                                                                                                         | 16                               |
| pCA24N::lon                           | cat; lacI <sup>q</sup> ; pCA24N P <sub>T5-lac</sub> ::lon <sup>+</sup>                                                                                                    | This work                        |
| pCA24N::lonK362Q                      | cat; lacI <sup>q</sup> ; pCA24N P <sub>T5-lac</sub> ::lon <sup>K362Q+</sup>                                                                                               | This work                        |
| pCA24N::lonS679A                      | cat; lacI <sup>q</sup> ; pCA24N P <sub>T5-lac</sub> ::lon <sup>S679A+</sup>                                                                                               | This work                        |
| pTAC3590                              | pBR322; att $\lambda$                                                                                                                                                     | 15                               |

**Table S2. Cont.**

| Strains/plasmids | Genotype/plasmid properties                                       | Source                |
|------------------|-------------------------------------------------------------------|-----------------------|
| pMGJ4004         | pOU254, <i>bla</i> , <i>relB</i> <sup>R81A</sup> :: <i>lacZYA</i> | 10                    |
| pMO229           | pBlueScript SK <sup>-</sup> <i>DsRed2</i>                         | Laboratory collection |
| pMO227           | pMGJ4004 <i>relB-relE</i> <sup>R81A</sup> :: <i>DsRed2</i>        | This work             |
| pMG25            | pUC <i>bla</i> <i>lacI</i> <sup>q</sup> pA1/O4/O3                 | Laboratory collection |
| pEJM10           | pMG25 SD <sub>OPT</sub> :: <i>hisG</i> :: <i>yefM</i>             | This work             |

\*In the case of the *mazEF* locus, we only deleted the *mazF* gene because we found that our *mazEF* deletion strain exhibited a partially relaxed phenotype, probably attributable to an effect on expression of *relA* that is located 80 bp upstream of *mazE*.

<sup>†</sup>GFP-free.

**Table S3. DNA primers**

|                      |                                                                               |
|----------------------|-------------------------------------------------------------------------------|
| higBA deletion-f     | 5' ACATTCTCTTGTAGCGTTTTCTACGTTTATTCTTCGTCACACAGATCTCTACGCCGGACGCATCGTG        |
| higBA deletion-r     | 5' GGAGATTTAAATCGTTATTTGAAGCGCCGGATGCAACGCATCCGGCAGTACTGATCAGTGATAAGCTGTC     |
| higBA up-f           | 5' ACCGATAACGTCGCCTGGGA                                                       |
| higBA up-r           | 5' GAAGCGCCGGATGCAACGCATCCGTAGAAAAACGCTAAACAAGAG                              |
| higBA down-f         | 5' CTCTTGTTTAGCGTTTTCTACGGATGCGTTGCATCCGGCGCTTC                               |
| higBA down-r         | 5' CATCGGTTGTGGCGGGATTG                                                       |
| yafNO deletion-f     | 5' GTATACTATTATGTATATTCTGGTGTGCATTATTATGAGGGTATCACTGTCTCTACGCCGGACGCATCGTG    |
| yafNO deletion-r     | 5' GCTGAAAATCGCCAGGCTGATAGTTTCTTATTTGTATGTTATTCATAATATAAACTGATCAGTGATAAGCTGTC |
| yafNO up-f           | 5' GGAGCGTAGTCAGGGGATTG                                                       |
| yafNO up-r           | 5' CTTATTTGTATGTTATTCTATAATAAATAATGCACACCAGAATATACAT                          |
| yafNO down-f         | 5' ATGTATATTCTGGTGTGCATTATTATGAATAACATACAAAATAAGAAAC                          |
| yafNO down-r         | 5' ACCAGGCGGGCGTTATTTTC                                                       |
| mqsRA deletion-f     | 5' ATACGTTTTGTGGTCACTATCTCCGTACATCTAACTAACCTTTTAGGTCCTCTACGCCGGACGCATCGTG     |
| mqsRA deletion-r     | 5' TACGCCTGTGGCATTGTTGCTCAAACTATCGCGAGTGATTTGGCTCACACTGATCAGTGATAAGCTGTC      |
| mqsRA up-f           | 5' GCGTCGCCTGGGACGACCCT                                                       |
| mqsRA up-r           | 5' AGTGATTTGGCTCACAGGTTAGTTAGATGTACGGA                                        |
| mqsRA down-f         | 5' TCCGTACATCTAACTAACCTGTGAGCCAAATCACTCGCGA                                   |
| mqsRA down-r         | 5' GAGCGGGCTGCACCTGGCCT                                                       |
| prlF/yhaV deletion-f | 5' GCCATGTTTTATTGTTTAAAGCCCCACGTCCATTAATAATGCATTGCTCTACGCCGGACGCATCGTG        |
| prlF/yhaV deletion-r | 5' AAGGCTGGGGTTGAAGTGATTCTGGTCGGGGAGTGAGAAAGGATGCCCGCACTGATCAGTGATAAGCTGTC    |
| prlF/yhaV up-f       | 5' TTGTCTGTGGCAGCAACAG                                                        |
| prlF/yhaV up-r       | 5' TGGTCGGGGAGTGAGAAAGGGCAAATGCATTATTAATGGAC                                  |
| prlF/yhaV down-f     | 5' GTCCATTAATAATGCATTGCTTTCCTTTCTCACTCCCCGACCA                                |
| prlF/yhaV down-r     | 5' CTGCTCTGATGCGCAAGCAC                                                       |
| hicAB deletion-f     | 5' GTTATTATTCAGTTTGCAAATTAGCGCAAAGAAATTCTGGAATCTTCCTCTACGCCGGACGCATCGTG       |
| hicAB deletion-r     | 5' TCATTATCGAATCGTAATTATGTGCAGATGATTCGGCAGTCTATATCAGTACTGATCAGTGATAAGCTGTC    |
| hicAB up-f           | 5' GTAAGTCCGGATGAGCTGCTG                                                      |
| hicAB up-r           | 5' CAGATGATTCGGCAGGCTAATTTGCAAACTGAATAATAAC                                   |
| hicAB down-f         | 5' GTTTTGCAAATTAGCGGCAAAGAGTTATCGCTGGTG                                       |
| hicAB down-r         | 5' CTGCGTTTCCTGGCGTAAGT                                                       |
| lon-f                | GCCAATCCTGAGCGTTCTGAA                                                         |
| lon-r                | CCTTTTGCACTCACAACCTG                                                          |
| DsRed2-BamHI-SD8-f   | CCCCGGATCCTAAGGAGGAAAAAATGGCCTCCTCCGAGAACGTC                                  |
| DsRed2-EcoRV-r       | CCCCCGATATCCTACAGGAACAGGTGGTGGCG                                              |
| yefM-f               | CCCCGAATTCAAGGAGTTTTATAAATGCACCACCACCACCACCGTACAATTAGCTACAGCGAAGCG            |
| yefM-r               | CCCCGGATCCTCACTCAATGATGTCTTTCCGT                                              |
